# Supplementary material for: ZnO–Au–SnO2Z-scheme photoanodes for remarkable photoelectrochemical water splitting
Source: Royal Society of Chemistry journal article supplement (doi:10.1039/c6nr05605a), 2016-01-01
Supplement: c6nr05605a1.pdf [file c6nr05605a1.pdf]

## Electronic Supplementary Information

### ZnO-Au-SnO<sub>2</sub> Z-scheme Photoanodes for Remarkable

### Photoelectrochemical Water Splitting

Jing-Mei Li,<sup>‡</sup> Hao-Yun Cheng,<sup>‡</sup> Yi-Hsuan Chiu and Yung-Jung Hsu\*

Department of Materials Science and Engineering, National Chiao Tung University,  
Hsinchu 30010, Taiwan

**Table S1.** Fitting results for emission decay profiles of EY in the presence of different samples.

| entry                         | <i>A</i> <sub>1</sub> (%) | <i>τ</i> <sub>1</sub> (ns) | <i>A</i> <sub>2</sub> (%) | <i>τ</i> <sub>2</sub> (ns) | <i>&lt;τ&gt;</i> (ns) | <i>χ</i> <sup>2</sup> | <i>k</i> <sub>ct</sub> (s <sup>-1</sup> )                        |
|-------------------------------|---------------------------|----------------------------|---------------------------|----------------------------|-----------------------|-----------------------|------------------------------------------------------------------|
| EY                            | 19.40                     | 16.42                      | 80.60                     | 2.26                       | 11.27                 | 1.006                 | -                                                                |
| EY/ZnO                        | 16.64                     | 15.01                      | 83.36                     | 1.83                       | 10.01                 | 1.040                 | 0.11×10 <sup>8</sup> (EY → ZnO) <sup>a</sup>                     |
| EY/SnO <sub>2</sub>           | 17.87                     | 15.61                      | 82.13                     | 2.02                       | 10.54                 | 1.021                 | 0.06×10 <sup>8</sup> (EY → SnO <sub>2</sub> ) <sup>a</sup>       |
| EY/Au                         | 19.26                     | 16.29                      | 80.74                     | 2.21                       | 11.19                 | 1.014                 | 0.01×10 <sup>8</sup> (EY → Au) <sup>a</sup>                      |
| EY/ZnO-Au                     | 10.61                     | 14.66                      | 89.39                     | 1.66                       | 8.31                  | 1.000                 | 0.20×10 <sup>8</sup> (ZnO → Au) <sup>b</sup>                     |
| EY/ZnO-Au-SnO <sub>2</sub> -1 | 1.82                      | 14.44                      | 98.18                     | 1.35                       | 3.52                  | 1.010                 | 1.78×10 <sup>8</sup> (ZnO → Au → SnO <sub>2</sub> ) <sup>c</sup> |
| EY/ZnO-Au-SnO <sub>2</sub> -2 | 0.71                      | 14.42                      | 99.29                     | 1.31                       | 2.26                  | 1.006                 | 3.36×10 <sup>8</sup> (ZnO → Au → SnO <sub>2</sub> ) <sup>c</sup> |
| EY/ZnO-Au-SnO <sub>2</sub> -3 | 2.93                      | 14.49                      | 97.07                     | 1.44                       | 4.48                  | 1.013                 | 1.17×10 <sup>8</sup> (ZnO → Au → SnO <sub>2</sub> ) <sup>c</sup> |

<sup>a</sup>The value was calculated by the expression

$$k_{ct}(\text{EY} \rightarrow \text{A}) = \frac{1}{\langle \tau \rangle} (\text{EY}/\text{A}) - \frac{1}{\langle \tau \rangle} (\text{EY}), \text{ where A = ZnO, SnO}_2 \text{ or Au.}$$

<sup>b</sup>The value was calculated by the expression

$$k_{ct}(\text{ZnO} \rightarrow \text{Au}) = \frac{1}{\langle \tau \rangle} (\text{EY}/\text{ZnO} - \text{Au}) - \frac{1}{\langle \tau \rangle} (\text{EY}/\text{ZnO}) - k_{ct}(\text{EY} \rightarrow \text{Au}).$$

<sup>c</sup>The value was calculated by the expression

$$k_{ct}(\text{ZnO} \rightarrow \text{Au} \rightarrow \text{SnO}_2) = \frac{1}{\langle \tau \rangle} (\text{EY}/\text{ZnO} - \text{Au} - \text{SnO}_2) - \frac{1}{\langle \tau \rangle} (\text{EY}) - k_{ct}(\text{EY} \rightarrow \text{ZnO}) - k_{ct}(\text{EY} \rightarrow \text{SnO}_2)$$

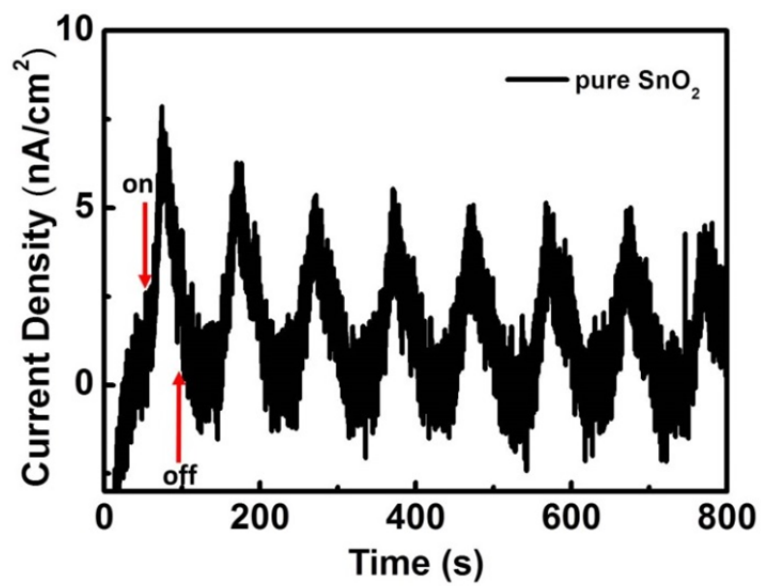

**Figure S1.** Chronoamperometric *I*-*t* curve of pure SnO<sub>2</sub> collected at 0 V vs. Ag/AgCl under chopped light illumination.

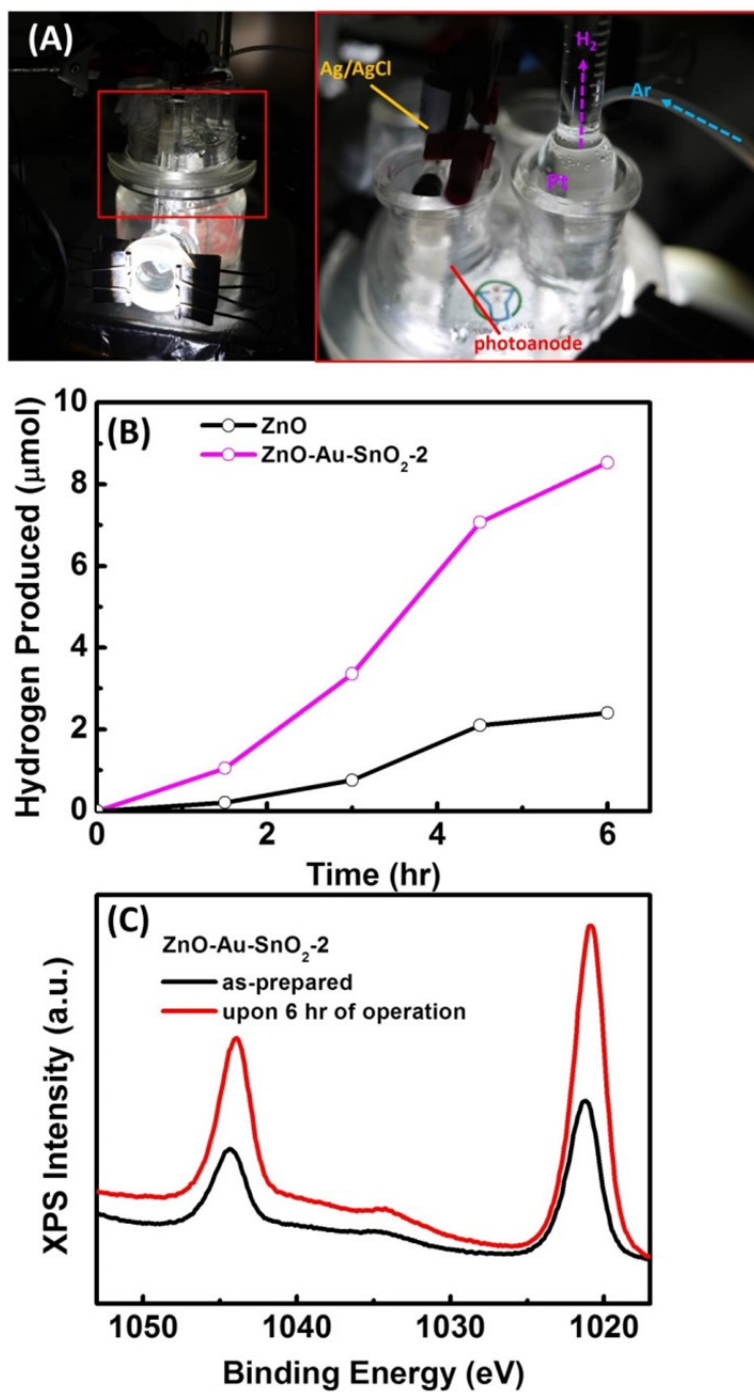

**Figure S2.** (A) PEC cell configuration for hydrogen evolution measurement. (B) Hydrogen production for pristine ZnO and ZnO-Au-SnO<sub>2</sub>-2 recorded in the PEC cell. (C) XPS spectra of ZnO-Au-SnO<sub>2</sub>-2 before and after 6 hr of PEC measurement. The Zn 2p signals were consistent with the presence of ZnO with the binding energy of 1021 and 1044 eV for Zn 2p<sub>1/2</sub> and Zn 2p<sub>3/2</sub>, respectively.
